# Supplementary material for: Collagen-I influences the post-translational regulation, binding partners and role of Annexin A2 in breast cancer progression
Source: PubMed Central journal article supplement (PMC10628465; doi:10.3389/fonc.2023.1270436), 2023-10-24
Supplement: DataSheet_1.pdf [file DataSheet_1.pdf]

## *Supplementary Material*

# Collagen-I influences the post-translational regulation, binding partners and role of Annexin A2 in breast cancer progression

### 1 Supplementary Tables

**Supplementary Table 1: List of antibodies used in western blotting, immunofluorescence and immunoprecipitation in paper.**

| Target                     | Cat number | Species | Source                        | Usage                                                                                                          | Ref in text                |
|----------------------------|------------|---------|-------------------------------|----------------------------------------------------------------------------------------------------------------|----------------------------|
| Phospho-Annexin A2 (Tyr24) | sc-135753  | Mouse   | Santa Cruz Biotechnology Inc. | Western blot - 1:250.                                                                                          | Figs: 1(A)                 |
| Annexin A2                 | ab41803    | Rabbit  | Abcam                         | Western blot – 1:1000.<br>Immunofluorescence – 1:500<br>Immunoprecipitation - 1 µg per 500 µg of total protein | Figs: 1(A, C, D), 4 (A, B) |
| Annexin A2                 | 610069     | Mouse   | BD Transduction Laboratories  | Western blot – 1:1000                                                                                          | Figs: 1(B)                 |
| Beta-Actin                 | A5441      | Mouse   | Sigma Aldrich Ltd             | Western blot – 1:1000                                                                                          | Figs: 1(A), 4(B)           |
| GAPDH                      | SAB1405848 | Mouse   | Sigma Aldrich Ltd             | Western blot – 1:1000                                                                                          | Figs: 1(B)                 |

|             |         |        |                               |                                                                                                             |                      |
|-------------|---------|--------|-------------------------------|-------------------------------------------------------------------------------------------------------------|----------------------|
| Na/K-ATPase | 30105S  | Rabbit | Cell Signalling Technologies  | Western blot – 1:1000                                                                                       | Figs: 1(B)           |
| Fibronectin | sc-8422 | Mouse  | Santa Cruz Biotechnology Inc. | Immunoprecipitation - 2 µg per 100 µg of total Protein.<br>Western Blot- 1:100<br>Immunofluorescence -1:100 | Figs: 4 (A, C, D, E) |
| Akt         | 9272S   | Rabbit | Cell Signalling Technologies  | Western Blot – 1:1000                                                                                       | Fig 4 (A)            |

**Supplementary Table 2: List of candidate Annexin A2 binding partners identified only when MDA-MB-231 cells are plated on a collagen-I substrate.**

| Protein name          | Gene  | HGNC  | UniProt | Brief Description                                                                                       |
|-----------------------|-------|-------|---------|---------------------------------------------------------------------------------------------------------|
| Keratin 17            | KRT17 | 6427  | Q04695  | Type I cytokeratin. Upreg. Via EGFR activation and reported binding partner of Annexin A2. <sup>1</sup> |
| Ribosomal protein S16 | RPS16 | 10396 | P62249  | Component of the small 40s subunit of the mammalian ribosome.                                           |

|                                                                                   |          |       |        |                                                                                                                                                                                           |
|-----------------------------------------------------------------------------------|----------|-------|--------|-------------------------------------------------------------------------------------------------------------------------------------------------------------------------------------------|
| Cytoskeleton Associated Protein 5                                                 | CKAP5    | 28959 | Q14008 | Regulates microtubule dynamics organization and plays a role in spindle formation.                                                                                                        |
| Ubiquitin C                                                                       | UBC      | 12468 | P0CG48 | A polyubiquitin precursor.                                                                                                                                                                |
| Family With Sequence Similarity 120A or Oxidative Stress-Associated Src Activator | FAM120A  | 13247 | Q9NZB2 | Involved in oxidative stress-induced survival signaling. Activates src family kinases and acts as a scaffolding protein for the phosphorylation of PI3-K.                                 |
| Desmoplakin                                                                       | DSP      | 3052  | P15924 | Involved in the organization of the desmosomal cadherin-plakoglobin complexes into discrete plasma membrane domains and in the anchoring of intermediate filaments to desmosomal plaques. |
| WASH Complex Subunit 5                                                            | KIAA0196 | 28984 | Q12768 | Recruits complexes to induce actin polymerization at endosomal surfaces, and                                                                                                              |

|                                              |        |       |        |                                                                                                                                                                                                             |
|----------------------------------------------|--------|-------|--------|-------------------------------------------------------------------------------------------------------------------------------------------------------------------------------------------------------------|
|                                              |        |       |        | plays a key role in the fission of tubules.                                                                                                                                                                 |
| DDB1 And CUL4 Associated Factor 1            | DCAF1  | 30911 | Q9Y4B6 | Involved in ubiquitin-protein ligase complexes and as an atypical serine/threonine-protein kinase. Known to play key roles in processes such as cell cycle, telomerase regulation and histone modification. |
| WASH Complex Subunit 2C                      | FAM21C | 23414 | Q9Y4E1 | Similar to WASHC5, mediates the recruitment of the F-actin-capping protein dimer to the WASH core complex.                                                                                                  |
| Heat Shock Protein Family A (Hsp70) Member 8 | HSPA8  | 5241  | P11142 | Constitutively expressed heat-shock protein, functions as a chaperone, and binds to nascent polypeptides to facilitate correct folding.                                                                     |
| Retinoic Acid Induced 14                     | RAI14  | 14873 | Q9P0K7 | Associated with cortical actin cytoskeleton structures in cell-cell adhesion sites and stress fibres.                                                                                                       |

|                                     |        |       |        |                                                                                                                    |
|-------------------------------------|--------|-------|--------|--------------------------------------------------------------------------------------------------------------------|
| Thrombospondin-1                    | THBS1  | 11785 | P07996 | Adhesive glycoprotein that mediates cell-to-cell and cell-to-matrix interaction.                                   |
| SRSF Protein Kinase 1               | SRPK1  | 11305 | Q96SB4 | Involved in the regulation of mRNA splicing by regulating localization of splicing factors.                        |
| DExH-Box Helicase 29                | DHX29  | 15815 | Q7Z478 | A member of the DEAD box family of RNA helicases, that functions in translation initiation.                        |
| Vesicle Amine Transport 1           | VAT1   | 16919 | Q99536 | An integral membrane protein of cholinergic synaptic vesicles, thought to be involved in vesicular transport.      |
| Ubiquitin Associated Protein 2 Like | UBAP2L | 29877 | Q14157 | Involved in the ubiquitin-proteasome system and aggregate formation induced by proteasome inhibitors. <sup>2</sup> |
| Fibronectin                         | FN1    | 3778  | P02751 | Extracellular matrix protein involved in cell adhesion and migration.                                              |

|                                                      |        |       |        |                                                                                                                 |
|------------------------------------------------------|--------|-------|--------|-----------------------------------------------------------------------------------------------------------------|
| Ribosomal Protein S15                                | RPS15  | 10388 | P62841 | Component of the small 40s subunit of the mammalian ribosome.                                                   |
| Tight junction protein ZO-2                          | TJP2   | 11828 | Q9UDY2 | A component of the tight junction barrier in epithelial and endothelial cells.                                  |
| Formin Like 1                                        | FMNL1  | 1212  | O95466 | Required in the cortical actin filament dynamics and cell shape.                                                |
| Itchy E3 Ubiquitin Protein Ligase                    | ITCH   | 13890 | Q96J02 | Acts as an E3 ubiquitin-protein ligase, involved in targeting proteins for lysosomal degradation.               |
| Ataxin 2 Like Protein                                | ATXN2L | 31326 | Q8WWM7 | Involved in the regulation of stress granule and P-body formation.                                              |
| Eukaryotic Translation Initiation Factor 3 Subunit H | EIF3H  | 3273  | O15372 | Part of the eukaryotic translation initiation factor 3 (eIF-3) complex, required for in translation initiation. |

Note: Description information adapted from Stelzer *et al.* (2016).

Additional References : <sup>1</sup> : Chung *et al.* (2012) <sup>2</sup>: Huang *et al.* (2020)

## 2 Supplementary Figures

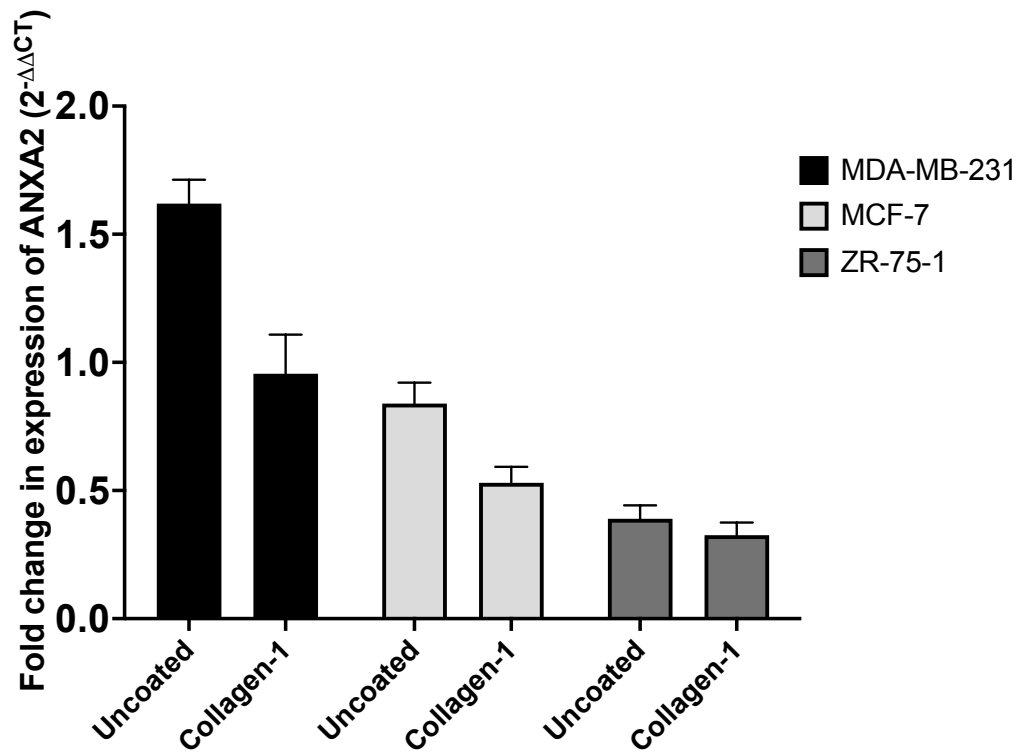

**Supplementary Figure 1: qPCR analysis of ANXA2 expression in breast cancer cell lines when cultured on collagen-I coated plates.** Gene expression of ANXA2 in three breast cancer cell lines: MDA-MB-231, MCF-7 and ZR-75-1. Expression was calculated using delta CT method and displayed as fold change (corrected RQ) in comparison to uncoated MCF-7 expression (i.e. mean uncoated MCF-7 expression normalised to 1)  $\pm$ SEM. Differences between cell lines analysed by students T test. (\*= $p < 0.05$ ,  $n=3$ )

# A Image analysis workflow

## Identify primary objects (nuclei)

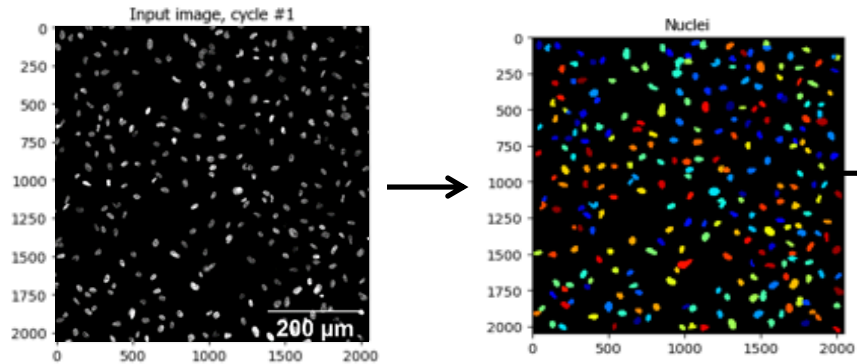

## Identify secondary objects (cells)

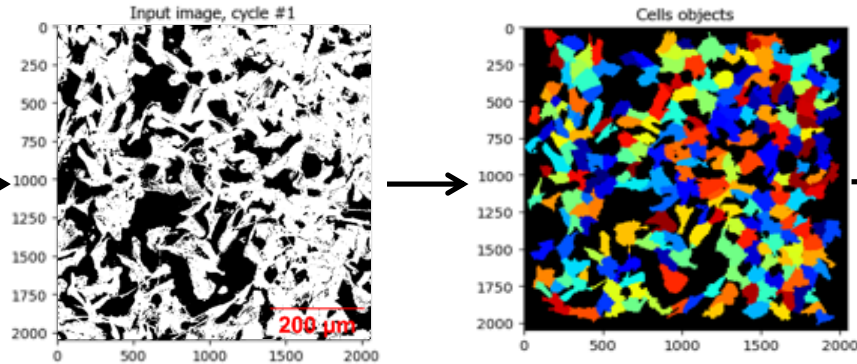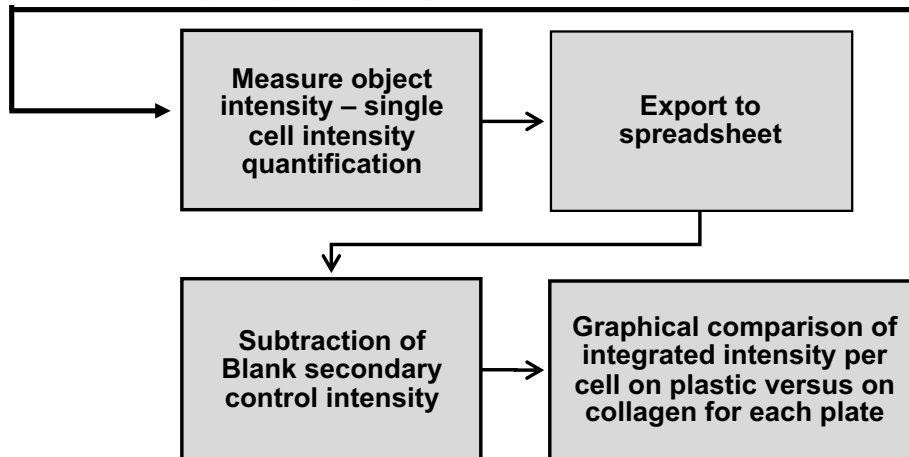



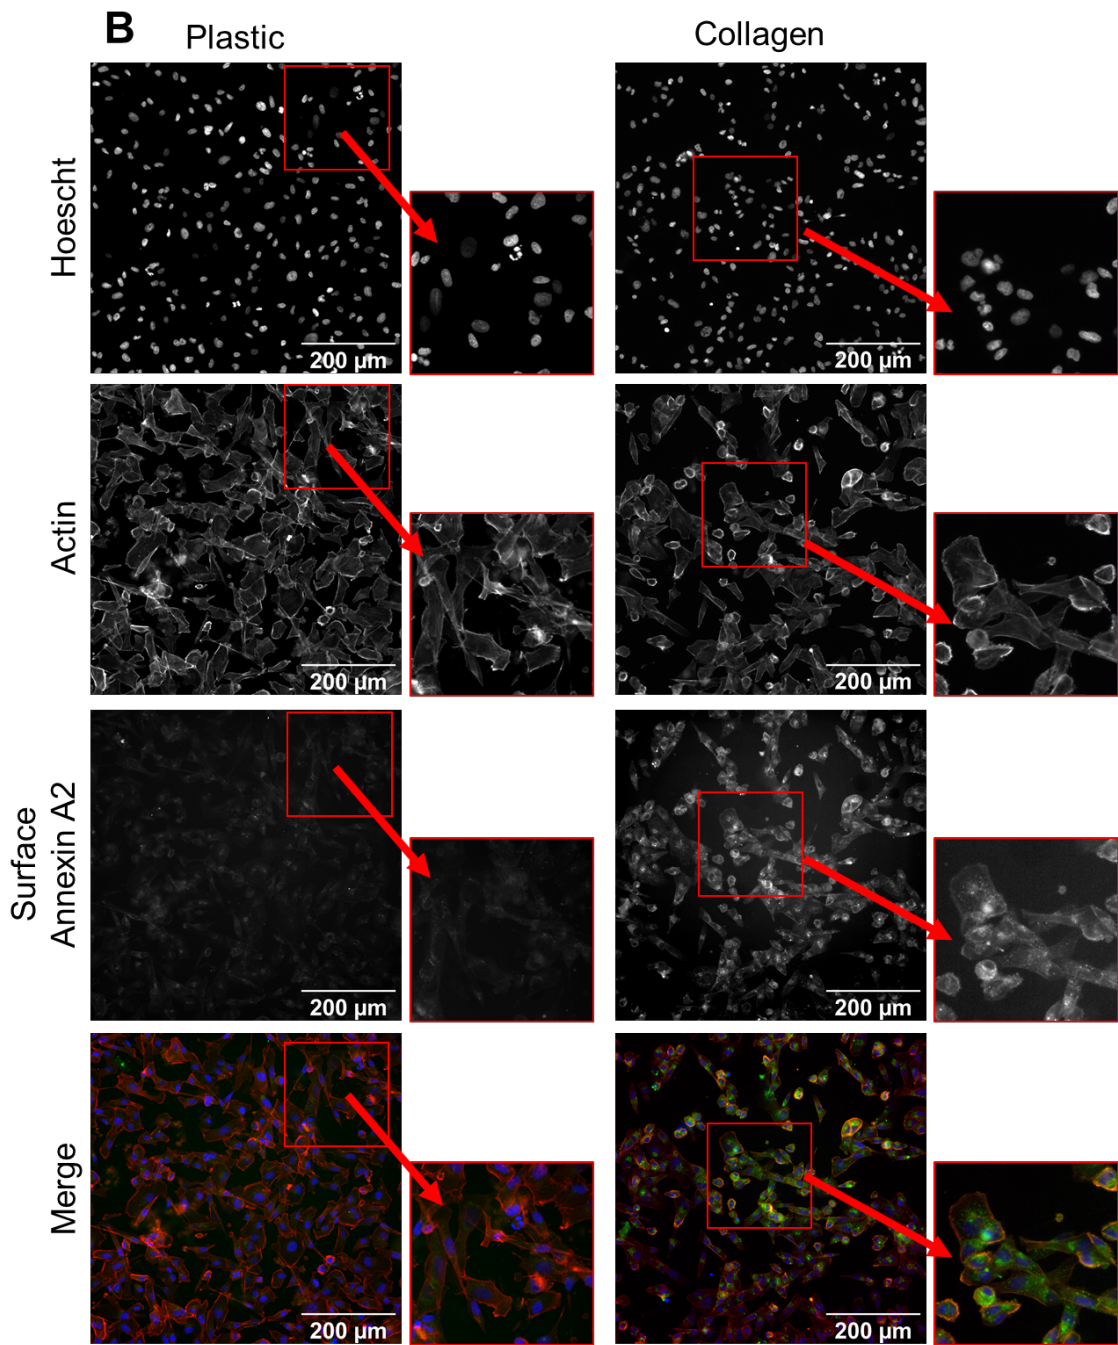

Annexin A2 Secondary control

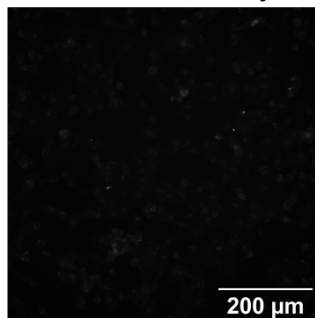

**Supplementary Figure 2:** Workflow & analysis for immunofluorescence microscopy of surface Annexin A2 staining **(A)** Images were analysed using Cell Profiler vers.3.1.9 (Broad Institute, US) (McQuin et al., 2018) according to the illustrated workflow. **(B)** Representative images show the difference in Annexin A2 staining between MDA-MB-231 cells on uncoated versus collagen coated plastics. DAPI: Hoechst staining of nuclei, TRIT-C: Phalloidin stain of actin cytoskeleton, FIT-C: Alexa-fluor-488 staining of surface Annexin A2. Secondary antibody only control shows representative image, the average fluorescence of which was subtracted from experimental data.

**A Centrality statistics for FN1 in network depicted in Figure 3 A (ii)**

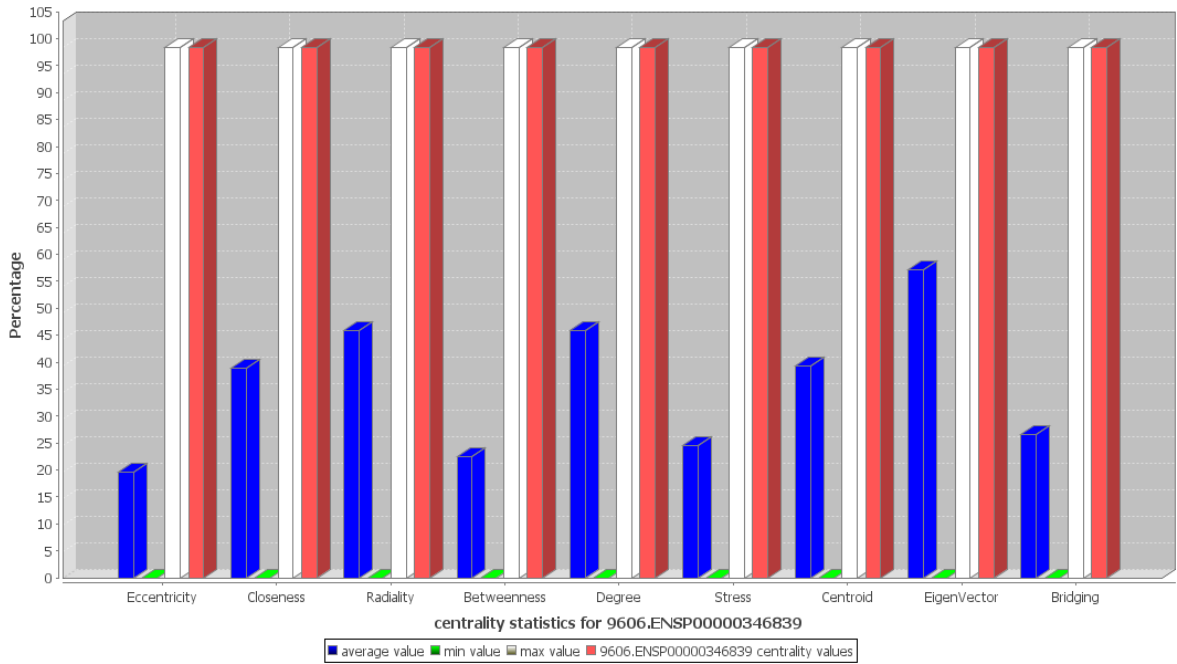

**B Centiscape scatter plot (Betweenness vs Stress) for network depicted in Figure 3**

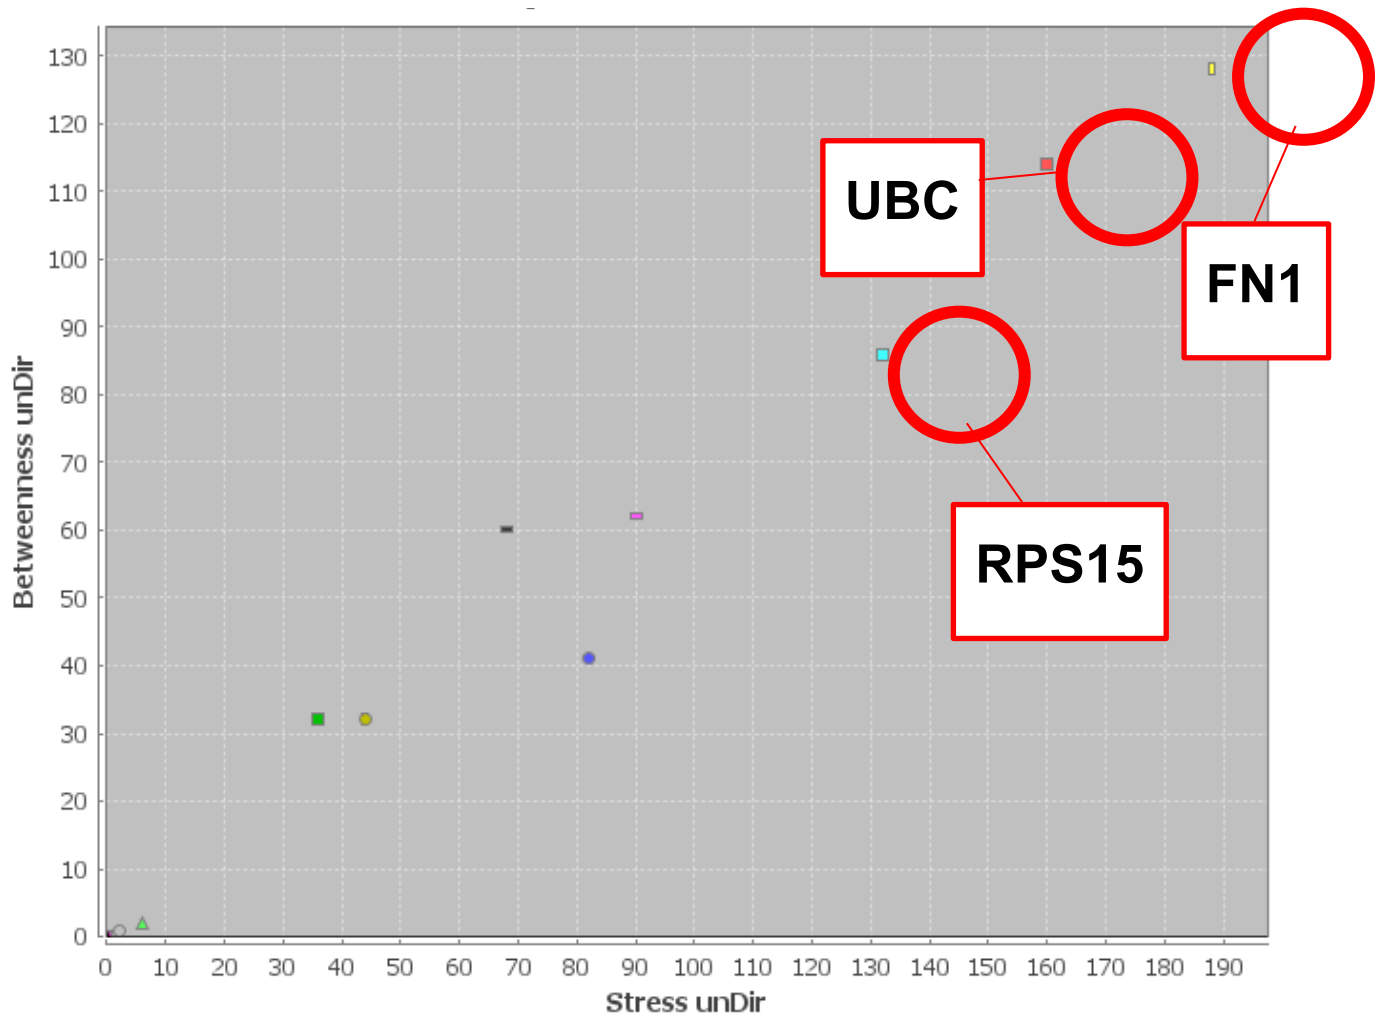

**Supplementary Figure 3:** (A) Centrality values for FN1 node within the Cytoscape network depicted in **Figure 3 (B)** were computed using CentiScaPe with default settings (G. Scardoni et al, 2009). For each parameter the specific node value (red), the average value (blue), the min value (green) and the max value (white) is shown. (B) Scatter plot of Betweenness versus Stress for network depicted in **Figure 3 (B)**, with three protein nodes of highest centrality values highlighted. The upper right quadrant would be expected to hold the most relevant nodes in a network.

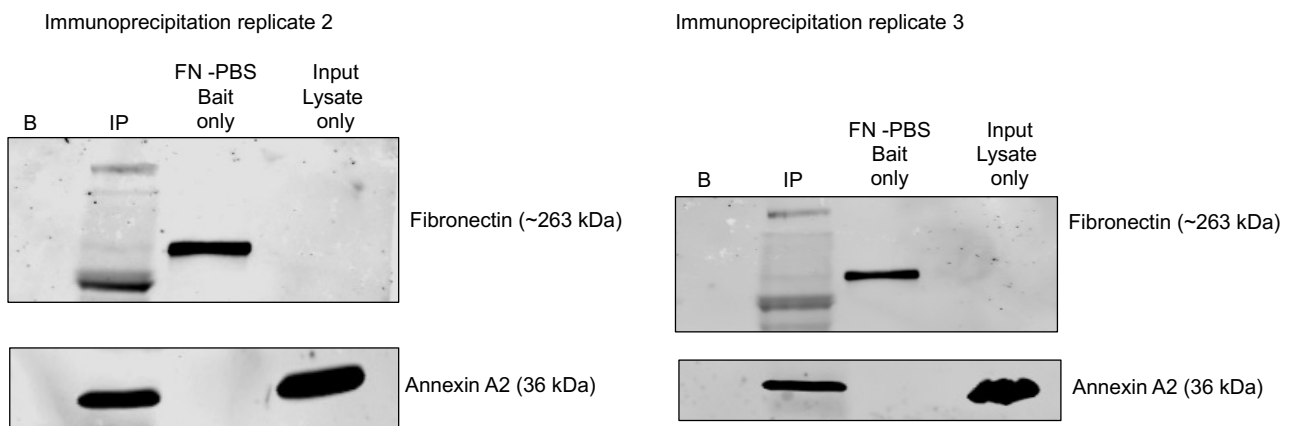

**Supplementary Figure 4:** Additional representative images of the Immunoprecipitation showing interaction between fibronectin and Annexin A2, with included FN-Bait only lane. B: Blank, no antibody incubation control, IP: immunoprecipitation, proteins pulled down using fibronectin baited beads from MDAMB231 cell lysate. FN-PS Bait: purified fibronectin in PBS, used to incubate with protein g agarose beads and anti-FN complex to create bead-antibody-fibronectin bait complex. Input lysate only: lysate of MDA-MB-231 cells pre-incubation with the bead-antibody-fibronectin bait complex.

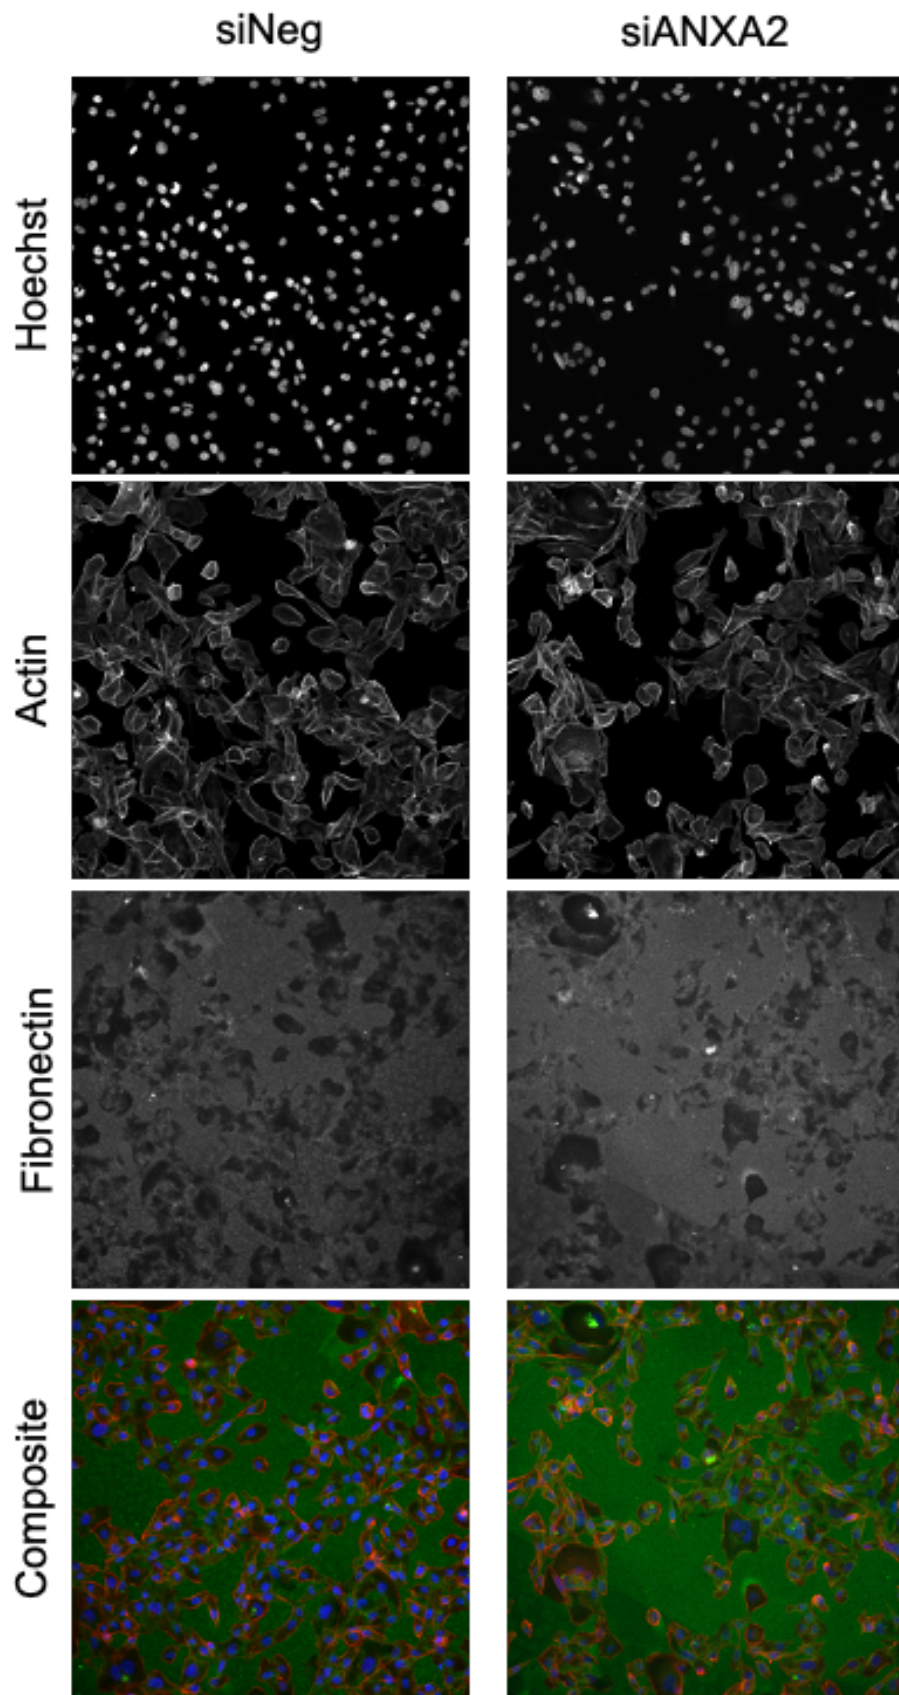

**Supplementary Figure 5:** Representative images of transfection negative control (siNeg) versus ANXA2 knockdown (siANXA2) MDA-MB-231 cells on fibronectin coated plastic. Showing fibronectin degradation quantification in green. Hoechst: staining of nuclei, TRIT-C: Phalloidin stain of actin cytoskeleton, FIT-C: Alexa-fluor-488 staining of fibronectin.
